# Supplementary material
Source: MDPI journal article supplement (https://www.mdpi.com/2073-4344/14/3/173)
Supplement: s1 [file s1]

## Supplementary Material

# Co–HOAT Complexes Change Their Antibacterial and Physicochemical Properties with Morphological Evolution

Xiaolin Xu <sup>1,†</sup>, Mengna Ding <sup>1,†</sup>, Shiwen Yu <sup>1</sup>, Fujian Lv <sup>1</sup>, Yun Zhang <sup>1</sup>, Yingchun Miao <sup>1,\*</sup>, Zhenfeng Bian <sup>2,\*</sup> and Hexing Li <sup>2</sup>

<sup>1</sup> Key Laboratory of Environment Chemistry, Faculty of Chemical and Environmental Science, Qujing Normal University, Qujing 655000, China; zhangyun@mail.qjnu.edu.cn (Y.Z.)

<sup>2</sup> The Education Ministry Key Laboratory of Resource Chemistry, Shanghai Key Laboratory of Rare Earth Functional Materials, Shanghai Normal University, Shanghai 200234, China; hexing-li@shnu.edu.cn

\* Correspondence: yingchun1979@sohu.com (Y.M.); bianzhenfeng@shnu.edu.cn (Z.B.); Tel./Fax: +86-21-6432-2272 (Y.M.)

† These authors contributed equally to this work.

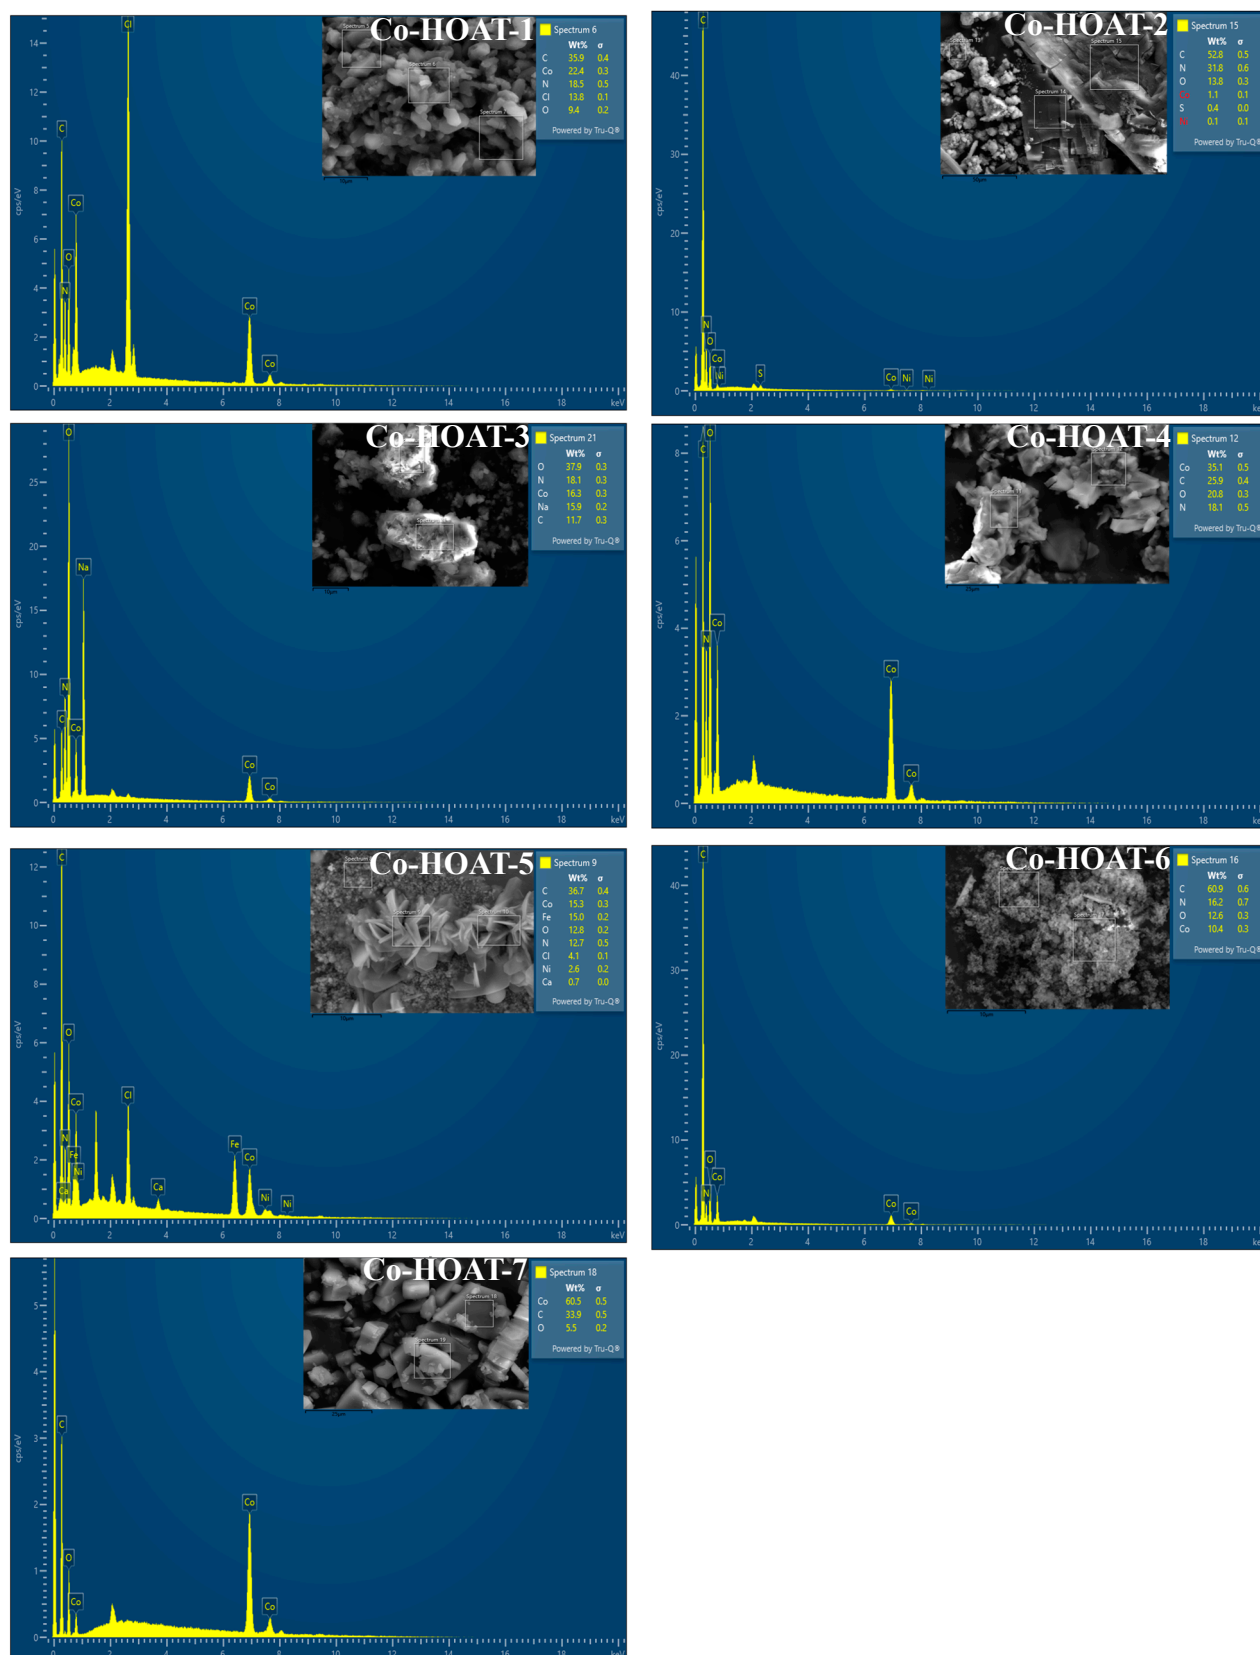

**Supplementary Figure S1.** The EDS mapping spectrum of Co-HOAT-1, Co-HOAT-2, Co-HOAT-3, Co-HOAT-4, Co-HOAT-5, Co-HOAT-6 and Co-HOAT-7, respectively.

**Supplementary Table S1.** The existed potential chemical bonds in seven Co-HOATs derived from FTIR spectra.

| Chemical<br>Bonds | -N-OH<br>(cm <sup>-1</sup> ) | -N-O<br>(cm <sup>-1</sup> ) | -R <sub>1</sub> R <sub>2</sub> -N-<br>(cm <sup>-1</sup> ) | -N=N <sup>+</sup> -O-<br>(cm <sup>-1</sup> ) | -N=N-<br>(cm <sup>-1</sup> ) | Pyridine ring<br>(cm <sup>-1</sup> ) |
|-------------------|------------------------------|-----------------------------|-----------------------------------------------------------|----------------------------------------------|------------------------------|--------------------------------------|
| Co-HOAT-1         | 1274.9                       | 954.0                       | 1600.4                                                    |                                              |                              | 1594-1444                            |
| Co-HOAT-2         |                              | 941.0                       |                                                           | 2355.0                                       |                              | 1594-1444                            |
| Co-HOAT-3         |                              | 950.0                       |                                                           | 2356.0                                       |                              | 1594-1444                            |
| Co-HOAT-4         |                              | 950.0                       |                                                           | 2343.4                                       |                              | 1594-1444                            |
| Co-HOAT-5         | 1276.0                       | 927.0                       |                                                           | 2280.0                                       |                              | 1594-1444                            |
| Co-HOAT-6         | 1271.0                       | 949.5                       |                                                           | 2221.0                                       |                              | 1594-1444                            |
| Co-HOAT-7         | 1275.8                       | 936.0                       |                                                           | 2300.0                                       |                              | 1594-1444                            |

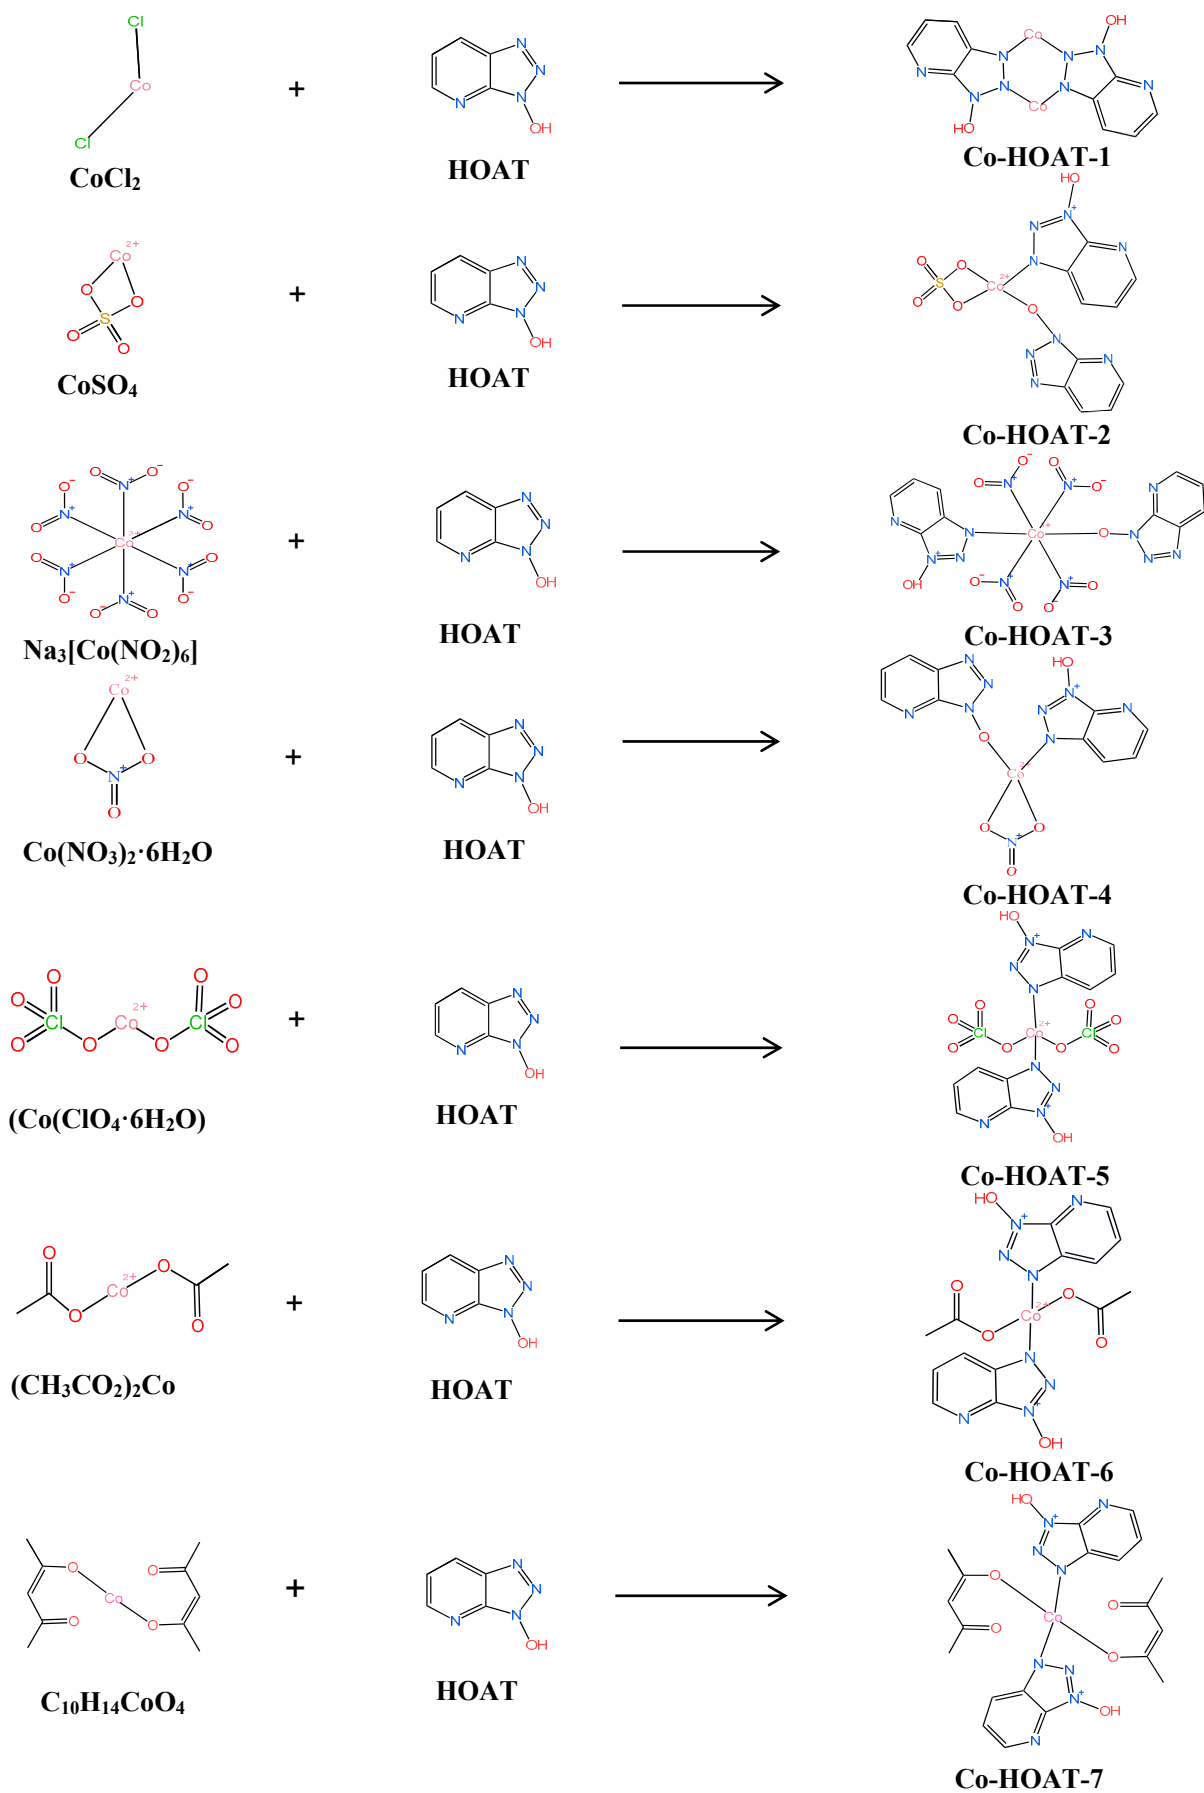

Supplementary Scheme S1. The potential structure of seven Co-HOATs derived from FTIR and Raman spectra.

**Supplementary Table S2.** The cobalt ratio in catalysts of Co-HOAT-1, Co-HOAT-2, Co-HOAT-3, Co-HOAT-4, Co-HOAT-5, Co-HOAT-6 and Co-HOAT-7, respectively.

| Catalysts | Abs   | Concentration (mg/l) | Co ratio (mg/g) |
|-----------|-------|----------------------|-----------------|
| Co-HOAT-1 | 0.754 | 8.92                 | 0.88            |
| Co-HOAT-2 | 0.783 | 9.79                 | 0.98            |
| Co-HOAT-3 | 0.736 | 8.41                 | 0.84            |
| Co-HOAT-4 | 0.739 | 8.49                 | 0.85            |
| Co-HOAT-5 | 0.751 | 8.84                 | 0.88            |
| Co-HOAT-6 | 0.739 | 8.49                 | 0.85            |
| Co-HOAT-7 | 0.728 | 8.18                 | 0.82            |
